# 1 Definition of regulatory elements and transcription factors controlling 2 immune cell gene expression at single cell resolution using single nucleus 3 ATAC-seq

4  
5 Pengxin Yang<sup>1</sup>, Ryan Corbett<sup>1</sup>, Lance Daharsh<sup>1</sup>, Juber Herrera Uribe<sup>1</sup>, Kristen A. Byrne<sup>2</sup>,  
6 Crystal L. Loving<sup>2</sup>, Christopher Tuggle<sup>1</sup>

7  
8 1.Department of Animal Science, Iowa State University, 2255 Kildee Hall, Ames, IA, 50011,  
9 USA.

10 2.USDA-ARS, NADC, 1920 Dayton Ave, Ames, IA, 50010, USA.

11 Correspondence: [cktuggle@iastate.edu](mailto:cktuggle@iastate.edu)

12 Keywords: pig, immune cells, single cell chromatin accessibility, single-nucleus ATAC,  
13 FAANG, scRNA-seq and snATAC-seq integration, regulatory network

## 16 ABSTRACT

17  
18 The transcriptome of porcine peripheral blood mononuclear cells (PBMC) at single cell (sc)  
19 resolution is well described, but little is understood about the cis-regulatory mechanism behind  
20 scPBMC gene expression. Here, we profiled the open chromatin landscape of porcine PBMC  
21 using single nucleus ATAC sequencing (snATAC-seq). Approximately 22% of the identified  
22 peaks overlapped with annotated transcription start sites (TSS). Using clustering based on open  
23 chromatin pattern similarity, we demonstrate that cell type annotations using snATAC-seq are  
24 highly concordant to that reported for sc RNA sequencing (scRNA-seq). The differentially  
25 accessible peaks (DAPs) for each cell type were characterized and the pattern of accessibility of  
26 the DAPs near cell type markers across cell types was similar to that of the average gene  
27 expression level of corresponding marker genes. Additionally, we found that peaks identified in  
28 snATAC-seq have the potential power to predict the cell type specific transcription starting site  
29 (TSS). We identified both transcription factors (TFs) whose binding motif were enriched in cell  
30 type DAPs of multiple cell types and cell type specific TFs by conducting transcription factor  
31 binding motif (TFBM) analysis. Furthermore, we identified the putative enhancer or promoter  
32 regions bound by TFs for each differentially expressed gene (DEG) having a DAP that  
33 overlapped with its TSS by generating cis-co-accessibility networks (CCAN). To predict the  
34 regulators of such DEGs, TFBM analysis was performed for each CCAN. The regulator TF-  
35 target DEG pair predicted in this way was largely consistent with the results reported in the  
36 ENCODE Transcription Factor Targets Dataset (TFTD). This snATAC-seq approach provides  
37 insights into the chromatin accessibility landscape of porcine PBMCs and enables discovery of  
38 TFs predicted to control DEG through binding regulatory elements whose chromatin  
39 accessibility correlates with the DEG promoter region.

## 41 1. INTRODUCTION

42  
43 The pig is of great economic importance since it is a crucial source of protein and meat world-  
44 wide. Pigs are also a valuable model for translational biomedical research resulting from their

45 high similarity to human in size, genomics, immunology and physiology (Groenen et al., 2012;  
46 Dawson et al., 2013; Lunney et al., 2021). Benchmark epigenetic studies analyzing multiple  
47 tissues have characterized porcine cis-regulatory elements (Kern et al., 2021; Zhao et al 2021),  
48 and cis-regulatory elements were reported to have higher conservation with human than between  
49 human and mouse (Zhao et al., 2021). Peripheral blood mononuclear cells (PBMCs) are an  
50 extensively studied sample in -omics and biomedicine since they are easy to collect and express  
51 numerous functional markers (Vandiedonck, 2018). In addition, PBMCs include many of the  
52 major cells in porcine immunity. Thus, PBMCs can serve as a great resource to monitor  
53 individual immune homeostasis.

54 Transcriptomes of porcine PBMCs at both bulk and single cell resolution using RNA-seq and  
55 single-cell RNA sequencing (scRNA-seq), respectively, have been reported (Herrera-Uribe et al.,  
56 2021). But gene expression alone provides limited information in terms of gene regulation. The  
57 chromatin accessibility of human hematopoietic cells was profiled by applying transposase-  
58 accessible chromatin sequencing in single nuclei (snATAC-seq) (Buenrostro et al., 2018). But  
59 such single cell/nuclei epigenomic landscapes in porcine PBMCs has not been reported.  
60 Genome-wide chromatin accessibility can reflect not only the transcription factor (TF) binding  
61 but also the regulatory capacity at the open chromatin region (Klemm et al. 2019). snATAC-seq  
62 allows inference of gene expression for genes with low RNA abundance that are hard to detect  
63 by scRNA-seq methods. snATAC-seq also makes it possible to predict future transcription since  
64 the openness of chromatin likely happens prior to any transcription. It has been reported that  
65 snATAC-seq has comparable ability to scRNA-seq in terms of cell type annotation and may be  
66 able to detect more distinct cell types compared to scRNA-seq (Miao et al. 2021). Moreover, by  
67 calculating co-accessibility, snATAC can predict long-range chromatin interaction which is  
68 unique compared to scRNA (Pliner et al. 2018). Therefore, elucidating the chromatin  
69 accessibility of porcine PBMCs can provide necessary information to identify the cell type  
70 specific cis-regulatory elements that, through chromatin interactions, have the capacity to  
71 regulate transcription. Such identified regulomes can enhance the understanding of the epigenetic  
72 mechanisms governing the establishment of cell differentiation and cell functionality.

73 Here, to elucidate the genome-wide epigenetic landscape of porcine PBMCs and identify the cis-  
74 regulatory mechanism governing the known cell type specific gene expression of porcine  
75 peripheral immune cells, we profiled the chromatin accessibility of porcine PBMCs by applying  
76 snATAC-seq. Cell types were annotated by manual gene marker-based annotation using  
77 snATAC alone or by integration with our published PBMC scRNAseq data (Herrera-Uribe et al.,  
78 2021). Differentially accessible peaks (DAPs) for genes in each annotated cell type were  
79 identified, and TFs enriched in annotated cell type DAPs were predicted. Cis-co-accessibility  
80 networks (CCANs) were generated to predict the long-range chromatin interaction regulating  
81 nearby genes, and TF binding motif (TFBM) enrichment analysis on the DAPs in each CCAN  
82 was performed.

83

84

## 85 **2. RESULTS**

86

### 87 **2.1 Single-cell chromatin landscape of healthy porcine immune cells**

88

89 The chromatin accessibility landscape of PBMCs collected from two healthy 6-month male pigs  
90 was profiled by performing a microfluidics-based snATAC-seq via 10x Genomics  
91 Chromium platform. We generated 4 snATAC-seq libraries from two replicate samples per pig  
92 and sequenced them via Illumina Novaseq 6000 sequencing runs. We generated chromatin  
93 accessibility profiles from 20,861 nuclei.

94  
95 The expected fragment size distribution periodicity and TSS enrichment in each of the four  
96 datasets were identified (Supplementary Fig 1A). The average median TSS enrichment score  
97 across the four snATAC-seq datasets was 17.99 (16.56-19.20) (Supplementary Fig 1B-E). Nuclei  
98 doublets from each dataset were detected and filtered out (1,466 doublets) using ArchR  
99 (Supplementary Fig 2A-L) (Granja et al. 2021). A set of 110,444 high quality peaks with an  
100 average length of 1,086 bp were identified and used for quantifying Tn5 transposase cut sites for  
101 each dataset. 78.3% of snATAC peaks (86,494) overlapped with peaks derived from ATAC-seq  
102 of bulk sorted porcine PBMC populations (Corbett et al., manuscript in prep), demonstrating  
103 high concordance of chromatin accessibility between ATAC-seq on a bulk population and  
104 snATAC-seq (Supplementary Fig 3A). To further characterize identified peaks, the proportion of  
105 detected peaks in each genomic region was calculated (Fig 1A). Briefly, 22% of peaks were  
106 within 3kb of the TSS of a gene. The Tn5 insertion frequency was re-quantified for each of the  
107 snATAC-seq datasets to create a feature matrix and Seurat object. To check consistency across  
108 the four datasets, we randomly selected one region and noted that the peaks across different  
109 datasets were highly uniform with each other (Supplementary Fig 4 A-D). Then low-quality  
110 nuclei were filtered out based on total number of fragments in the nuclei, number of peaks in the  
111 nuclei, nucleosome signal and TSS enrichment score for each dataset. The four datasets were  
112 then merged and integrated to generate an evenly distributed snATAC dataset comprising 17,207  
113 nuclei (Supplementary Fig 5A-B). The 2nd to 30th latent semantic indexing (LSI) component  
114 was used for clustering analysis since the first LSI component is highly correlated with  
115 sequencing depth (Supplementary Fig 5C)(Stuart et al., 2021). Consequently, 35 clusters of  
116 nuclei, with at least 1,444 differentially accessible peaks (DAPs) in all pairwise clusters, were  
117 identified using a shared nearest neighbor clustering algorithm (Seurat/Signac) and visualized on  
118 Uniform Manifold Approximation and Projection (UMAP) (Fig 1B, Supplementary Table 1-2).  
119 Overall, there was no obvious dataset-specific clusters though there were a few clusters (cluster  
120 10, 21, 23, 25, 28 and 34) mainly composed of nuclei from either 6798.2x or 6800.2x dataset  
121 likely due to the fact that the number of nuclei in those two datasets were approximately four  
122 times that of the other two datasets (Supplementary Fig 5D-H). This demonstrated that the batch  
123 effect was effectively removed.

124

125

126 **Figure 1 Major porcine peripheral blood mononuclear cell types identified through single**  
127 **nucleus chromatin accessibility profiles**

128

129 A: Pie chart showing the proportion of indicated genomic regions detected as peaks in snATAC-  
130 seq dataset

131 B. UMAP plot of 17,207 nuclei isolated from PBMC subjected to snATAC-seq and separated  
132 into 35 clusters based on similarity of the chromatin accessibility pattern. Each point represents a  
133 single nucleus.

134 C: UMAP plot of estimated *CD86* gene activity by counting the Tn5 transposase cutting sites in  
135 all fragments near *CD86* gene (< 2000bp of TSS).

136 D: UMAP plot of the chromatin accessibility at a cluster differentially accessible peak (DAP)  
137 (13-138488083-138490791) whose nearest gene is monocyte cell marker *CD86*.

138  
139

## 140 **2.2 Cell type annotation of porcine PBMC using chromatin accessibility landscape**

141

142 The cell type of each cluster was manually classified by estimating the gene activity from the  
143 number of Tn5 transposase cutting sites within the identified peaks of +/-2kb of TSS of well-  
144 defined canonical marker genes. A series of marker genes (Herrera-Uribe et al., 2021) for  
145 specific cell types were investigated for their overall gene activity in each cluster (see example of  
146 *CD86*, a myeloid cell marker, in Fig 1C, other marker gene activity patterns are shown in  
147 Supplementary Figs 6-11). We also identified differentially accessible peaks (DAPs) for each  
148 cluster (average  $\log_2FC > 0.25$ ,  $p\_val\_adj < 0.05$ ) and approximately 18% (20,070 of 110,444) of  
149 the unique cis-elements were found to be differentially accessible in at least one cluster  
150 (Supplementary Table 3 DE.pig.resol2.4.2.30.findallmarker.onlypos.p0.05.txt). These DAPs  
151 whose nearest gene was a known cell-type-marker gene used in Herrera-Uribe et al., 2021 were  
152 annotated and used to estimate gene activity (Fig 1D, Supplementary Fig 12, Supplementary  
153 Table 4.). (see “Method” section). A cell was predicted to express a cell type functional gene if it  
154 demonstrated measurable gene activity. Consequently, clusters were assigned into 12 cell types  
155 (Fig 2A-2B). Seven clusters (0, 3, 4, 8, 11, 18, 20) were identified as B cells, one cluster (27) as  
156 antibody-secreting cells (ASCs), three clusters as monocytes (5, 7, 9), one cluster (29) as  
157 plasmacytoid dendritic cells (pDCs), one cluster (26) as conventional dendritic cells (cDCs),  
158 three clusters (2, 6, 12) as CD4+  $\alpha\beta$  T cells (CD4posab), six clusters (13, 19, 23, 24, 30, 32) as  
159 CD8 $\alpha\beta$ +  $\alpha\beta$  T cells (CD8abPOSab), one cluster (10) as natural killer cells (NK), three clusters  
160 (17, 21, 34) as T cells, two clusters (25, 33) as a mixture of CD8abPOSab and NK cells  
161 (CD8abPOSabT\_NK), four clusters (1, 14, 16, 28) as CD2-  $\gamma\delta$  T cells (CD2negGD), and one  
162 cluster (22) as CD2+  $\gamma\delta$  T-cells (CD2posGD). The latter two cell types (CD2-  $\gamma\delta$  T cells and  
163 CD2+  $\gamma\delta$  T-cells) were annotated based on a collection of marker genes (see “Methods”). Finally,  
164 two clusters (15, 31) were classified as unknown cells and no further analysis completed.

165

166 Interestingly, leveraging some cluster-specific cis-elements near known gene markers provided  
167 equivalent or even better cell type classification than using only overall gene activity (Fig 1C-1D,  
168 Supplementary Fig 12, see “Methods”). For instance, cluster 0, 3, 4, 8, 11, 18 and 20, which  
169 were annotated as B cells, demonstrated relatively high *CD19* gene activity measured using all  
170 cis-elements nearby yet almost exclusive chromatin accessibility at a cis-element near this  
171 known B cell marker *CD19* (Supplementary Fig 12A-B). Similarly, the chromatin accessibility  
172 of a potential cis-element near monocyte marker *CSF1R* in monocyte clusters 5, 7 and 9 was  
173 more unique to monocytes than the estimated *CSF1R* gene activity (Supplementary Fig 12C-  
174 12D). Likewise, a possible cis-element near *CD3E*, a known T cell marker, was more specific to  
175 all 16 T cells clusters compared to non-T cell clusters than the overall *CD3E* gene activity  
176 (Supplementary Fig 12E-12F). Finally, there is a cis-element near the *CD4* gene in CD4+  $\alpha\beta$  T  
177 cells, which enabled annotation of cluster 2, 6 and 12 as CD4+  $\alpha\beta$  T cells more confidently and  
178 specifically than utilizing the overall gene activity of *CD4* (Supplementary Fig 12G-12H).

179

## 180 **2.3 Integration of porcine PBMC snATAC dataset with comparable scRNA dataset**

181  
182 To further validate the cell type annotation and/or possibly revise it, the estimated gene activity  
183 from the snATAC dataset was integrated with our previously published scRNA-seq dataset  
184 (Supplementary Fig 13A) from porcine PBMCs (Herrera-Uribe et al., 2021) by identifying cross-  
185 modality pairwise “anchors” between the two datasets and transferring the scRNAseq annotation  
186 label (Stuart et al. 2019) to the snATACseq clusters. Most of the clusters (26 out of 35 clusters)  
187 had a median prediction score over 70% (Supplementary Fig 14, Supplementary Table 5  
188 celltype.prediction.score.table). For further functional comparisons, 1,164 nuclei with a  
189 prediction score lower than 0.5 were filtered out from the snATAC-seq dataset, leaving 16,043  
190 nuclei (93%) for final annotation and characterization.

191  
192  
193 The resulting cluster annotations assigned using gene expression from scRNAseq dataset and  
194 estimated gene activity of canonical genes for different immune cell types (Fig 2B) was almost  
195 identical to the predicted cell type labels in the scRNA dataset (Fig 2C) with the exception of  
196 clusters 17, 21 and 34. We decided to annotate the snATAC-seq clusters based on the cell type  
197 predicted after integration with scRNA-seq for the following reasons. First, the cell types  
198 predicted for cluster 17, 21 and 34 using the integrated analysis (Fig 2C) were more specific than  
199 cell types annotated using only cluster DAPs near known cell type markers (Fig 2B). Second, we  
200 compared chromatin accessibility of clusters annotated based on predicted cell types (Fig 2C) in  
201 peaks shared with those obtained from bulk ATAC-seq of bulk-sorted porcine PBMCs using  
202 principal component analysis and found they demonstrated high consistency with each other  
203 (Supplementary Fig 3B-C). In addition, an erythrocyte cluster was identified, but this will not be  
204 further discussed since there was only one cell predicted to be in this group. Finally, the  
205 integration did not resolve the two clusters annotated as a mixture of CD8 $\alpha\beta$ +  $\alpha\beta$  T/NK, nor  
206 provide further annotation of the two unknown clusters. Overall, the annotation obtained from  
207 integrating snATAC-seq with scRNA-seq clustering of matched cell populations across datasets  
208 provided additional biological support for assignment of the snATACseq clusters using only  
209 snATACseq data.

210  
211 **Figure 2 Cluster annotations delineated through integration snATAC-seq estimated gene**  
212 **activity and scRNA-seq gene expression was highly concordant with annotations derived**  
213 **from snATAC-seq data alone**

214  
215 A: Dotplot visualizing the chromatin accessibility at 26 cluster differentially accessible peaks  
216 (DAP) near canonical genes indicative of cell type in the 35 clusters derived from snATAC-seq  
217 (Fig 1B). The genomic coordinates of the DAP genes on x-axis are listed in Supplementary  
218 Table 6. The size of the dot represents the fraction of nuclei having chromatin accessibility at  
219 the matching DAP on x- axis in each cluster. The larger dot indicates a higher percentage of  
220 nuclei with the region accessible in respective cluster. The color of the dot denotes the average  
221 chromatin accessibility level across all nuclei in the respective cluster (red is high).

222 B: UMAP plot of the snATAC-seq dataset with cell types annotated from Fig 2A. Estimated  
223 gene activity score was calculated using two criteria described in materials and methods and cells  
224 in clusters were annotated into 13 cell types: B cells, CD2-  $\gamma\delta$  T-cells (CD2negGD), CD4+  $\alpha\beta$  T  
225 cells (CD4posab), Monocytes, natural killer cells (NK), CD8 $\alpha\beta$ +  $\alpha\beta$  T cells (CD8abPOSab), T



226 cells (T), CD2+  $\gamma\delta$  T-cells (CD2posGD), CD8abPOSa/NK cells (CD8abPOSabT\_NK),  
227 conventional dendritic cells (cDCs), antibody secreting cells (ASCs), plasmacytoid dendritic  
228 cells (pDCs) and unknown cells (not shown).

229

230 C: UMAP plot of the snATAC-seq dataset labeled with cell types predicted by integrating gene  
231 activity scores from snATAC-seq dataset (Fig 2A) and previously published porcine PBMC  
232 expression levels from scRNA-seq dataset. Clusters were classified into 12 cell types: B cells,  
233 CD2negGD, CD4posab, Monocytes, NK, CD8abPOSab, CD2posGD, CD8abPOSabT\_NK,  
234 cDCs, ASC, pDCs and unknown cells (not shown).

235

236

## 237 **2.4 Characterization of cell type specific cis-regulatory elements**

238

239 To identify the cell type specific regulatory genomic regions, DAPs more accessible in specific  
240 cell types were detected by performing a Wilcoxon Rank Sum test in Seurat ( $\log_{fc} > 0.25$ ,  
241  $p_{val\_adj} < 0.05$ ). Consequently, we identified 11,872 unique cell type-specific DAPs across 11  
242 cell types (Table 1; Supplementary Table 7 celltype.DAP.summary) and these DAPs were  
243 significantly enriched for DAPs in comparable bulk-sorted porcine PBMC cell populations  
244 (Supplementary Fig 3D). Such identified DAPs can be used to identify cis regulatory elements  
245 that are associated with specific cell type expression patterns and potentially contribute to the  
246 differential expression (DE) of nearby genes in the respective cell. We found that the cell type  
247 predicted by the accessibility pattern of identified cis-elements near marker genes in each cell  
248 type (Fig 3A) was similar to that predicted by the gene expression pattern of matching marker  
249 genes (Fig 3B). For example, we identified a cis-element region that overlaps the TSS of *CSF1R*,  
250 a monocyte marker gene, that is significantly more accessible in monocytes which potentially  
251 govern DE of *CSF1R* in monocyte cells in scRNA-seq dataset (1st column in Fig 3B). The fact  
252 that this cis-element is also accessible in the cDCs might explain the moderate expression of  
253 *CSF1R* in cDCs cells (1st column in Fig 3B). Interestingly, when this *CSF1R* DAP is plotted  
254 based on the frequency of Tn5 insertion events, this DAP is in the middle of *CSF1R* (Fig 3C).  
255 There are five *CSF1R* transcripts sharing three TSSs identified in pigs on Ensembl (Fig 3D), and  
256 two of them (for *CSF1R*-201 and *CSF1R*-202) have TSSs overlapping with this *CSF1R* DAP.  
257 Then, we extended the evaluation to all DAPs overlapping with a TSS of gene cell markers in  
258 Herrera-Uribe et al., 2021. Similarly, we identified only TSS of *CD8A*-201 was within the DAP  
259 whose nearest gene is *CD8A* among three transcripts of *CD8A* (Supplementary Fig 15B).

260

261 We also identified a cis-element region covering TSS of *PAX5* that was broadly accessible, with  
262 highest accessibility in B cells (4<sup>th</sup> column of Fig 3A). This element may regulate the expression  
263 of *PAX5* specifically in B cells, as *PAX5* expression was noted in all B cell clusters in scRNA-  
264 seq dataset (Fig 3B). Likewise, a cis-element region including TSS of *CD4* that was  
265 differentially accessible in annotated CD4posab cells was identified (Fig 3A) and it might  
266 account for the RNA expression pattern of *CD4* in CD4posab cells (Fig 3B). Unsurprisingly, this  
267 DAP near *CD4* was also accessible in pDCs since *CD4* is also expressed in that cell type (Fig  
268 3B). Intriguingly, this DAP is also accessible in CD8abPOSab cells (which do not express *CD4*)  
269 (albeit less so compared to CD4POSab cells), which might be due to *CD4* expression not being  
270 solely controlled by this DAP near *CD4* and there might be some other features that regulates the  
271 expression of *CD4*.

272

273 Identified cell type DAPs were then utilized to validate the integrated cell type annotation  
274 described in Fig 2B via two approaches: First, the nearest gene of cell type DAPs were extracted  
275 and labeled with corresponding human orthologous nomenclature. The gene ontology (GO)  
276 enrichment analysis was conducted using the human genes as input. The enriched GO terms lines  
277 up with the biological function of the matching cell type (Supplementary Fig 16-20). For  
278 example, the enriched terms with highest number of genes near B cell DAPs were “immune  
279 response-regulating signaling pathway” and the “enriched B cell activation” which align with the  
280 principal roles of B cells in the adaptive humoral immune system.

281

282

283 **Figure 3 Commensurate patterns of differentially accessible peaks and expression of**  
284 **nearby genes in porcine PBMC**

285

286 A: Dotplot visualizing identified differentially accessible peaks (DAPs) near canonical cell  
287 marker genes across 11 cell types annotated using integrated snATAC-seq and scRNA-seq (Fig  
288 2C) datasets. Such cell type DAPs are significantly more accessible ( $p\_val\_adj < 0.05$ ) in one  
289 cell type compared to the average of all other cell types (see “Methods”). The nearest genes of  
290 the 12 DAPs on the x-axis from left to right were: Monocyte markers *CSF1R* and *CD14*, DCs  
291 marker: *FLT3*, B cell markers: *PAX5* and *CD19*, T cell marker *CD3E*, CD4posab marker *CD4*,  
292 CD8abPOSab marker *CD8A* and *CD8B*, NK marker *PRF1* and *KLRK1*, GD marker *TRDC*. The  
293 size of the dot represents the fraction of cells having chromatin accessibility at the DAP for each  
294 cell type. The larger dot indicates a higher percentage of nuclei with accessible region in that cell  
295 type. The color of the dot denotes the average chromatin accessibility level across all nuclei  
296 within a cell type (red is high). The genomic coordinates of the DAP genes on x axis are listed in  
297 Supplementary Table 6. The full list of cell type DAPs is described in Table 1 and  
298 Supplementary Table 7 celltype.DAP.summary.

299 B: Dotplot visualizing gene expression of 12 marker DEGs across 11 cell types in scRNA-seq  
300 dataset. These 12 marker genes and their order on x-axis are the same as that of Fig 3A.

301 C: Visualization of the genomic regions near the monocyte marker gene *CSF1R* described in Fig  
302 3A. The genomic coordinate of the DAP shown in the shaded region is 151125625-151130033  
303 on chromosome 2. The gene track and longest transcript of *CSF1R* is shown at the bottom of the  
304 panel.

305 D: Visualization of different transcript of *CSF1R* created by Ensembl 102. Vertical arrows  
306 demonstrate that the Transcription Start Site (TSS) of *CSF1R-201* and *CSF1R-202* overlapped  
307 with the DAP described in Figure 3C.

308

### 309 **2.5 Cell type specific transcription factor activity**

310

311 To detect the TFs whose binding motif were enriched in the cell type specific cis-elements  
312 detected by snATAC-seq, and thus potentially control the cell’s biological functionality,  
313 transcription factor binding motif (TFBM) enrichment analysis was performed using the cell type

314 DAP genomic sequences as input to the HOMER package (see “Method” section)  
315 (Supplementary Table 8 TFBM.celltype.known.result.summary). Results for the top 20 enriched  
316 TFBM for each cell type are shown, clustered by their enrichment pattern across (x-axis) cell  
317 types and across transcription factor motifs (y-axis) (Fig 4). Overall, 69 unique TFs whose  
318 binding motif was enriched in cell type DAPs were identified. The gene activity of only about 32%  
319 of identified TFs were detected in respective annotated cell types in the scRNA-seq dataset. But  
320 expression of 74% of the TFs were detected in the matching or comparable cell type in bulk  
321 PBMC RNA-seq data which might result from the different capture efficiencies between scRNA-  
322 seq and bulk RNA seq (Herrera-Urbe et al., 2021). TFs in the same TF family were clustered  
323 together (Fig 4). It is interesting that the clustering of cell types by TFBM enrichment was fairly  
324 consistent with clustering shown in Fig 2B determined through chromatin accessibility patterns.  
325 While the TFBM enrichment pattern of the mixed CD8abPOSabT\_NK cell cluster was not  
326 similar to NK cell nor of CD8abPOSab T cell clusters (Fig 4), this cluster did share similar  
327 binding motif enrichment patterns to both NK cells (Figure 4, from Elk1 through Zfp281) and  
328 CD8abPOSab cells (Figure 4, from Fli1 through Sp1). The similar motif enrichment landscape  
329 observed between CD8abPOSabT\_NK, myeloid cells, and B lineage cells from AP-1 through  
330 ELF5 indicated the regulatory complexity of the CD8abPOSabT\_NK cluster (which is likely a  
331 mixed population) and thus was not explored in the downstream analysis.

332  
333

#### 334 **Figure 4 Transcription factor binding motif (TFBM) analysis of the cell type differentially** 335 **accessible peaks (DAPs) predicts TF regulating these cell type networks**

336

337 A: Heatmap visualizing binding motif enrichment level for top 20 TFs in each of the 11 major  
338 PBMC types. The color of the square denotes the value of  $-\log_{10}$  of multiple test adjusted q  
339 value with Benjamini multiple testing correction. The darker color, the smaller q value and the  
340 more statistically significant. \* denotes that the binding motif of the TF were statistically  
341 enriched ( $q < 0.05$ ) in the corresponding cell type. The TFs and cell types were both clustered by  
342 similarity of pattern using Euclidean distance. Cell types were annotated as described in Fig 2C:  
343 Monocytes, B cells, CD8abPOSab (CD8 $\alpha\beta^+$   $\alpha\beta$  T cells), CD4+  $\alpha\beta$  T cells (CD4posab), CD2-  
344  $\gamma\delta$  T-cells (CD2negGD), conventional dendritic cell (cDCs), antibody secreting cells (ASC),  
345 CD8 $\alpha\beta^+$   $\alpha\beta$  T/NK cells (CD8abPOSabT\_NK), NK, CD2+  $\gamma\delta$  T-cells (CD2posGD),  
346 plasmacytoid dendritic cells (pDCs).

347

348

349 We identified both general and cell type specific TF patterns of cell type TFBM enrichment of  
350 the TFs. Several TFs had detectable enrichment of their motifs in cell types with no detectable  
351 RNA expression in the scRNA-seq dataset, like *PAX6*, indicating scRNA-seq may not be  
352 sensitive enough to detect their expression, or that the TFBM enrichment observed is unrelated  
353 to gene regulation. Unsurprisingly, the binding motif of TFs playing a crucial role in multiple  
354 immune cell types or lineages, like *PUI* (also known as *SPI1*), *ETS*, *ETS1*, and *ETV2* were  
355 ubiquitously enriched in DAP for all cell types. We also identified a set of cell type specific TFs.  
356 The binding motif of *PAX5*, *PAX6* and *EBF* were only enriched in B cells which is compatible  
357 with the fact that *PAX5* is regarded as a B cell marker and *PAX6* has a similar binding motif to  
358 that of *PAX5*. We also predicted several TF with enriched motifs in specific cell types that have  
359 few to no reports describing them as regulators of gene expression in the immune cell type motif



360 enrichment was observed. These included *TCF21* which has not been reported in pDCs, and *Spi-*  
361 *B* and *TCF12* which was predicted as candidate regulators in pDCs development (Nagasawa et  
362 al., 2008). The binding motif of *Nur77* (*NR4A1*) was most enriched in CD2posGD cells though it  
363 was also enriched in mixed CD8aPOSabT\_NK cluster. The binding motif of several *GATA*  
364 family TFs (*GATA*, *GATA1*, *GATA2*, *GATA3*, *GATA4*, *GATA6*) were most highly enriched in  
365 CD2negGD cells. *TCF21* and *TCF12* had enrichment of binding motifs in pDCs DAP, which has  
366 also not been reported as expressed in or regulating genes specifically in pDCs. In addition, we  
367 found that *PU.1* had motif enrichment in myeloid cell DAPs (pDCs, cDCs and monocyte)  
368 through three different TF complexes (*PU.1*, *PU.1:IRF8*, and *PU.1-IRF*).

369

## 370 **2.6 Cell type specific chromatin interactions**

371 To predict the potential regulatory regions of DEGs (Supplementary Table 9) and predict the  
372 regulatory cis-element interactions of the TFs described in Figure 4 at specific DEGs, cis-co-  
373 accessibility networks (CCAN) analysis was performed using Cicero (Pliner et al., 2018). A  
374 CCAN is defined as a module of genomic regions that are statistically co-accessible with one  
375 another in the same cell type. To maximize the ability to link TFs to DEGs in this dataset,  
376 CCANs were predicted for each DEG with a TSS overlapping an open chromatin region that was  
377 a DAP in the matching cell type. Each CCAN has the following characteristics: 1) The “hub”  
378 peak of a CCAN overlaps with the TSS of a gene which was a DEG in the matching cell type; 2)  
379 all remaining peaks were assigned to the same CCAN as the “hub” peak if the peak has a co-  
380 accessibility score with the “hub” peak of at least 0.05 and was no more than 250,000 bp 5’ or 3’  
381 to the gene TSS. Across 11 cell types, we identified 244 such CCANs in total (Table 1), and the  
382 total number of peaks in these CCANs ranged from 3-49. The full list of genomic regions in each  
383 predicted significant CCAN for each cell type can be found at FigShare link  
384 [https://figshare.com/articles/journal\\_contribution/pig\\_PBMC\\_snATAC\\_CCAN\\_files\\_celltype\\_D](https://figshare.com/articles/journal_contribution/pig_PBMC_snATAC_CCAN_files_celltype_DEG_bed_files_zip/24762189)  
385 [EG\\_bed\\_files\\_zip/24762189](https://figshare.com/articles/journal_contribution/pig_PBMC_snATAC_CCAN_files_celltype_DEG_bed_files_zip/24762189) (DOI:10.6084/m9.figshare.24762189). As examples of CCAN with  
386 highest average co-accessibility score with the center peak in each cell type, we visualized  
387 CCANs associated with *POU2AF1* in B cells, *CST7* in NK cells, *MEF2C* in cDCs cells, CD5 in  
388 CD4posab cells (Fig 5), *FLNB* in ASC, *FSCN1* in CD2posGD, *ARLAC* in CD8abPOSab, *S100A8*  
389 in Monocytes and *CXorf21* in pDCs (Supplementary Fig 21).

390

## 391 **Figure 5. Cis-co-accessibility network (CCAN) architecture at indicated differentially** 392 **expressed gene in specific peripheral immune cell types**

393

394 Visualization of CCANs associated with DEGs in four different peripheral immune cell types.  
395 The center of each CCAN overlaps with the TSS of a DEG in respective cell type. Each purple  
396 line denotes that the peaks at either end of the line has a co-accessibility score greater than 0.05.  
397 Genes neighboring DEGs associated with each CCAN were not shown for the sake of clarity.

398

399 A: CCAN at *POU2AF1* in B cells. The “hub” peak (chr9-39139969-39146482) of this CCAN  
400 was a DAP overlapping TSS of *POU2AF1* in annotated B cells. All peaks identified in snATAC  
401 dataset in this region are shown, but only the 24 peaks correlated with the hub peak with a co-  
402 accessibility score > 0.05 are included in the CCAN (purple).

403

404 B: CCAN at *CST7* in NK cells. The “hub” peak (chr17-30755868-30762233) of this CCAN is a  
 405 CD2posGD cell DAP overlapping TSS of *CST7*. There were five peaks correlated with the hub  
 406 peak with a co-accessibility score > 0.05;

407  
 408 C: CCAN at *MEF2C* in cDCs cells. The “hub” peak (chr2-96274161-96278261) of this CCAN is  
 409 a cDCs cell DAP overlapping TSS of *MEF2C*. There were 19 peaks correlated with the hub peak  
 410 with a co-accessibility score > 0.05;

411  
 412 D: CCAN at *CD5* in CD4posab cells. The “hub” peak (chr2-10671164-10677736) of this CCAN  
 413 is a CD4posab cell DAP overlapping TSS of *CD5*. There were 16 peaks correlated with the hub  
 414 peak with a co-accessibility score > 0.05;

415 Table 1. *Cicero*-based predictions of regulatory element networks acting to regulate  
 416 Differentially expressed genes in specific cell types.

|            | #<br>DEG* | #<br>DAP* | #DAP<br>within<br>promoter | #CCAN with<br>promoter DAP<br>hub | #DEG with<br>promoter DAP | #CCAN associated<br>with DEG with<br>promoter DAP hub |
|------------|-----------|-----------|----------------------------|-----------------------------------|---------------------------|-------------------------------------------------------|
| Monocytes  | 864       | 3590      | 653                        | 47                                | 97                        | 14                                                    |
| B          | 308       | 1333      | 237                        | 104                               | 35                        | 33                                                    |
| CD8abPOSab | 273       | 424       | 83                         | 39                                | 12                        | 13                                                    |
| CD4posab   | 197       | 587       | 73                         | 33                                | 12                        | 8                                                     |
| CD2negGD   | 141       | 574       | 123                        | 0                                 | 9                         | 0                                                     |
| cDCs       | 507       | 1731      | 262                        | 132                               | 28                        | 26                                                    |
| ASC        | 593       | 2109      | 443                        | 222                               | 46                        | 42                                                    |
| NK         | 242       | 1114      | 235                        | 122                               | 28                        | 28                                                    |
| CD2posGD   | 158       | 676       | 206                        | 127                               | 11                        | 11                                                    |
| pDCs       | 771       | 3472      | 542                        | 228                               | 68                        | 69                                                    |
| Total      | 4054      | 15610     | 2857                       | 1054                              | 346                       | 244                                                   |

417  
 418 \*The statistical criteria are avg\_log2FC>0.25 and p\_val\_adj < 0.05

## 419 420 2.7 Regulators involved in cell type specific chromatin interactions

421  
 422 Since the TSS hub peak is co-accessible with the peaks in the rest of the CCAN, the CCAN  
 423 predicts regulatory regions potentially interacting with the accessible promoter to regulate  
 424 differential expression of the DEG through binding regulatory proteins (Muto et al., 2021). To  
 425 predict such potential regulatory TF for DEGs, TFBM enrichment analysis was performed, using  
 426 the combined regions from each CCAN as input to HOMER. The binding motif of 70 TFs (41  
 427 unique TFs) was found enriched in one or more CCANs. These motifs were associated with 45  
 428 DEG (43 unique genes) in 8 of 11 annotated PBMC cell types. Only a few of these 41 TFs were  
 429 detected in scRNAs-seq dataset while gene expression of 80% of these TFs were detected in  
 430 corresponding or most comparable cell type in bulk RNA-seq of sorted porcine immune cells.  
 431 These differences result from the fact that bulk RNA-seq has a deeper sequencing depth(Herrera-  
 432 Uribe et al., 2021). Some TFs (*ZNF519, GFY, ISRE, Fra1, Fra2, GFY, SpiB and GRE*) were not  
 433 detected in bulk RNA-seq, which can be the result of the following factors: 1) Their expression  
 434 levels were too low to be detected by bulk RNA-seq, 2) Since we used vertebrate motif sets to  
 435 perform TFBM analysis, these TFs do not necessarily have to be expressed in porcine immune

436 cells, 3) It could be that other expressed TFs, who are in the same family of these undetected TFs,  
437 function as real regulators since they have similar binding motif.

438 The results are illustrated across these CCANs through sorting by cell type and clustering by  
439 patterns of enrichment of TF motifs (Fig 6). Unsurprisingly, *CTCF* and *BORIS* (a CTCF-Like  
440 Protein) were in the same cluster and their binding motif was enriched in the CCANs of multiple  
441 genes. *IRF1* can directly bind the IFN-stimulated response element (*ISRE*) to control expression  
442 of IFN-stimulated gene regarding *IFN-I* and *IFN-II* (Michalska et al., 2018). This might explain  
443 why *IRF2*, which is also in the *IRF* family having conserved binding domain, and *ISRE* are  
444 assigned into the same cluster. In addition, our results demonstrate the value of CCANs to  
445 identify putative regulators of DEG and verify TF-related genes previously predicted in Fig 4.  
446 For example, *POU2AF1* is a transcriptional coactivator in complex with either *OCT1* or *OCT2*  
447 whose binding motif were enriched in global B cell DAPs in Fig 4. Moreover, the enriched  
448 binding motif of CTCF in the CCAN of *CST7* in CD2posGD could have contributed to the  
449 enriched binding motif of CTCF in CD2posGD DAPs in Figure 4.

450

451

### 452 **Figure 6 Transcription factor binding motif (TFBM) analysis on CCANs peaks identified** 453 **potential regulator TFs for specific DEGs**

454

455 Potential transcription factors regulating cell type specific CCANs were identified through  
456 evaluation of transcription factor binding motif analysis of cis-co-accessibility network analysis.

457 A: Heatmap visualizing the enrichment level of all TFs whose known binding motif(s) were  
458 enriched ( $q \leq 0.1$ ) in at least one CCAN associated with a DEG having a DAP overlapping with  
459 its TSS. The column denotes the DEG which is the hub of the CCAN, and the cell type for which  
460 the hub gene is differentially expressed is shown. The row denotes the TFs whose binding motif  
461 are enriched across all peaks of a CCAN. The color of the cell denotes the value of  $-\log_{10}$  of  $q$   
462 value for enrichment. The darker color, the smaller  $q$  value and the more statistically significant.  
463 \* denotes that the binding motif of the TF are statistically enriched ( $q < 0.1$ ) in the peaks of the  
464 CCAN associated with corresponding DEG. The TFs is clustered using Euclidean distance.

465

466

467 Overall, there are 1-3 TF binding motifs enriched in each CCAN. Interestingly, exception to this  
468 observation is the binding motif of 13 TFs enriched in the CCAN associated with *PRF1* in NK  
469 cells. *PRF1* is highly expressed in NK cells and encodes a central protein (perforin) for NK cell  
470 function; thus, a highly active CCAN at the *PRF1* promoter is not surprising. One of these,  
471 *NRF2*, is known to regulate *PRF1* (Jessen et al., 2020). On the other hand, several of these TFs  
472 are sub-units of *AP-1*, a well-known general transcription factor: Fos gene family members  
473 (*FOS*, *FOSL2*, *Fra1(FOSL1)* and *Fra2(FOSL2)*) can encode protein dimerizing with proteins in  
474 Jun family (*JunB* and *Jun*) to form the *AP-1* transcription factor complex. In addition, *MAFK* or  
475 other small *MAF* proteins can bind to the same motif as *NF-E2*. Thus, this unusually large  
476 number of different TFBM enriched in the *PRF1* CCAN may be explained due to these  
477 functional overlaps for an *AP-1*-regulated gene. Interestingly, there is potential antagonistic  
478 interactions among enriched TF at *PRF1*; *BACH2* regulates transcription (activation or  
479 repression) via *MAFK*, but *BACH2* can inhibit *AP-1* proteins in blood (Lesniewski et al., 2006).

480

481 To compare our predicted TF-target gene pairs with other studies, we explored the target genes  
482 of the 41 unique TFs in the *ENCODE* Transcription Factor Targets dataset (TFTD), which was  
483 created using ChIP-seq (ENCODE, Project Consortium et al. (2004); Myers et al., 2011;  
484 Rouillard et al., 2016). 22 of the 41 unique TFs shown in Fig 6 and their predicted target genes  
485 have been reported in ENCODE TFTD. Notably, for these 22 TFs, 57% (30 out of 53) predicted  
486 TF-target gene pairs described in Fig 6 were highly consistent with the *ENCODE* TFTD result  
487 (Supplementary Table 10). For example, the binding motif of *IRF3* was enriched in the CCAN  
488 peaks of *POU2AF1*, which was identified as a target of *IRF3* reported in *ENCODE* TFTD. The  
489 binding motif of *CTCF* was enriched in CCANs of 15 DEGs (14 unique DEGs) and all of these  
490 predicted target genes were concordant with those reported in the *ENCODE* TFTD. Likewise,  
491 *ZKSCAN1* was predicted to regulate *CORO1C* in cDCs and *MAFK* to regulate *PRF1* in NK cells;  
492 these relationships were also reported in the *ENCODE* TFTD. Additionally, we also found some  
493 predicted regulatory relationships were similar to what has been reported in *ENCODE* TFTD.  
494 These include the result that *ETS* family TFs are predicted to bind to *ADGRE5* is analogous to  
495 the relationship of *ETS1* and *ADGRE5* reported in *ENCODE* TFTD (Supplementary Table 10).

496  
497 Further, we also have some novel findings beyond *ENCODE* TFTD. For example, TF *BATF* and  
498 its associated gene *PRF1* in NK cells were not reported in *ENCODE* TFTD. *IGSF8* is a DEG  
499 having a promoter DAP and predicted CCANs in both ASC and pDCs. Interestingly, the binding  
500 motif of both *CTCF* and *BORIS* are enriched in the CCAN of *IGSF8* in ASC, while the binding  
501 motif of *SpiB* is enriched in the CCAN of *IGSF8* in pDCs. Similar *IGSF8* expression level in  
502 ASC and pDCs (Supplementary Fig 13C), while enrichment of different TF in the same target  
503 gene might elucidate different regulatory mechanism governing the expression of *IGSF8* in  
504 different immune cell types through a different regulatory network. Notably, *SPIB* is predicted to  
505 be a target gene of *CTCF* in ENCODE TFTD. On the contrary, *PTPRE*, a DEG having a  
506 promoter DAP and predicted CCANs in both cDC and NK, might be regulated via similar  
507 pathways in these two cell types since the biological function of *BORIS* and *CTCF* is similar.

### 508 509 **3. Discussion**

510  
511 A detailed functional annotation of the porcine genome will greatly improve our understanding  
512 of porcine gene regulation and network biology, as well as accelerate genetic improvement of  
513 important traits such as disease resilience. While new epigenetic data across adult tissues has  
514 provided initial chromatin state maps (Kern et al., 2021; Pan et al. 2022), there is limited  
515 information on the regulatory regions in porcine immune cells (Foissac et al., 2019; Herrera-  
516 Uribe et al., 2020). To identify such regulatory elements, we profiled the first chromatin  
517 accessibility landscape of freshly isolated porcine PBMC at single cell resolution. We  
518 demonstrated that this landscape of accessible regions at known marker genes could be explored  
519 to annotate cell type without the use of gene expression data. Integration with scRNAseq data  
520 was effective to both verify such annotations and to improve some ambiguities. Identifying  
521 regions more accessible in specific cell types was then exploited to predict TF that may bind  
522 such regulatory elements to control cell type expression. Correlation of accessibility among open  
523 chromatin regions were then used to predict both cis-co-accessibility networks (CCANs) at  
524 specific genes, as well as predict the TF controlling expression of these genes. These results were  
525 validated with ATAC-seq data from bulk-sorted PBMC populations and are consistent with  
526 many reports on specific gene regulatory factor networks.



527

### 528 **3.1 Open chromatin regions detected with single nuclei ATACseq methods can be used to** 529 **identify and annotate specific immune cell types in porcine peripheral blood**

530

531 A deep collection of high-quality open chromatin regions was identified and approximately 22%  
532 of these accessible regions were within 3kb from the TSS of an annotated gene (Fig 1A). This  
533 fraction was relatively low compared to that reported for human (in kidney; Muto et al., 2021). It  
534 might originate from the fact that the pig genome is not annotated as well as that of human or  
535 that this is the characteristic of immune cells compared to tissues; however, we detected much  
536 higher TSS enrichment scores [average was 17.99 (Supplementary Fig 1B-E)] than that of  
537 human PBMC snATAC-seq whose average is 12.55 (Wu et al., 2022). Our two replicates showed  
538 high similarity and were integrated into a dataset of 17,207 nuclei and grouped into 35 clusters.  
539 By utilizing the DNA accessibility patterns of putative cis regulatory elements (gene activity) as  
540 a proxy for gene expression, this “gene activity” measure at several known gene markers for  
541 major cell types was used to annotate the 35 clusters. Gene activity for canonical gene markers  
542 was estimated with two methods: assigning all peak data (< 2,000 bp from TSS) to the closest  
543 gene, and by calculating the DAP for each cluster and using the specific DAP mapping proximal  
544 to the marker gene for estimating gene activity. We observed that the gene activity scores created  
545 from all nearby accessibility data were less definitive than the pattern(s) for DAPs at the  
546 canonical marker genes (Fig 1C-D, Supplementary Fig 6, Supplementary Table 4), which may  
547 demonstrate the most important regulatory elements for cell type expression may be TSS-  
548 proximal DAP. Using the TSS-proximal DAP approach, we classified cell type by inspecting  
549 DAP patterns near all markers whose scRNAseq patterns of expression were used as cell type  
550 markers in PBMC (Herrera-Uribe et al., 2020). Monocytes, B, ASC, DCs, T, CD4posab,  
551 CD8abPOSabT\_NK, NK, GD and unknown cells were determined sequentially. Consequently,  
552 the 35 clusters were grouped into 13 cell types (Fig 2B).

553

554 Comparing the chromatin accessibility pattern in Fig 2A and the corresponding gene expression  
555 pattern in Herrera-Uribe et al., 2021 two general DAP-cell type expression patterns were  
556 observed:

557 1) The DAP and the cell type where this DAP is open were consistent with the expression of the  
558 nearest gene in Herrera-Uribe et al., 2020. For instance, some B clusters (0, 8) and ASC (27) at  
559 *CD86* DAP2, ASC (27) at *CD19* DAP, cDCs (26) at *CSF1R* and *CD86* DAPs, DC(26,29) at  
560 *TCF4* DAP1, monocytes (5,7,9) at *FLT3* DAP, DC(26,29), ASC (27) and CD8abPOSab (13, 19,  
561 24, 30, 32) and CD8aPOSabT\_NK (25, 33) at *SLA-DRB1* DAPs, monocytes, B cells, ASC,  
562 CD8abPOSab, NK and CD8aPOSabT\_NK at *XBPI* DAP, CD8abPOSab at *PRF1* DAP, pDCs  
563 (29) at *CD4* DAP2.

564 2) Accessible chromatin patterns had no nearby gene with matching scRNAseq gene expression  
565 reported (Herrera-Uribe et al., 2020). For example, ASC (27) demonstrates DNA openness at  
566 *PAX5* DAP without revealing *PAX5* expression in Herrera-Uribe et al., 2020. Similar patterns  
567 were found in CD8abPOSab (24, 30) at *CD86* DAP2, CD2posGD (22) at *XBPI* DAP, NK (10),  
568 CD8abPOSab (30) and B (8) at *TRDC* DAP, pDCs (29) at *CD8B* DAP2. The chromatin  
569 accessibility at the DAP near *CD4* in cluster 21,23, and 30 in Fig 2A might demonstrate the  
570 complexity of the gene expression and there are potentially multiple regulatory regions  
571 controlling the expression of this gene. These patterns might originate from the complicity of  
572 regulative mechanism in biology, the heterogeneity of a known porcine immune cell type and the

573 variability of the sensitivity of snATAC-seq and scRNA-seq. Multiple regulatory elements and  
574 TFs can contribute to the regulation for the same gene coordinately and thus, the DNA openness  
575 at one cis-element near a gene might not necessarily pair with the gene expression in a cell type  
576 since they could miss an essential element to activate the gene expression compared to the cell  
577 types where the gene is expressed. Notably, we did not detect a peak overlapping the *CD2* gene  
578 that would distinguish CD2posGD and CD2negGD directly, although there are a few DAPs  
579 whose nearest gene is *CD2* (6,893bp or more distant, Supplementary Table 4). Because of this  
580 distance we did not use these peaks to predict *CD2* status or for cell type determination. We  
581 divided DC (26, 29) into sub types via the chromatin accessibility at *SLA-DRB1*, *CD8A*, *PRF1*  
582 and *KLRK1* cis-elements since they were highly expressed in CD2posGD but not CD2negGD  
583 cells, though they were not defined as CD2posGD markers (Herrera-Uribe et al., 2021).  
584

### 585 **3.2 Chromatin accessibility pattern annotation verified and improved through integration** 586 **with scRNAseq data**

587  
588 To further explore and validate these proposed annotations, the snATAC-seq data was integrated  
589 with previously published scRNAseq data, and a high level of validation was observed. We  
590 showed that the chromatin accessibility pattern of cis regulatory elements near the cell type  
591 markers used in Herrera-Uribe et al., 2020, was highly similar to the pattern of the expression  
592 level of matching DEG (Fig 2B-2C, Supplementary Table 5). Our results revealed the snATAC-  
593 seq has similar power to scRNA-seq in terms of cell type annotation, although there were a small  
594 number of inconsistencies. But its ambitious to define the cell type definitely using only using  
595 the peaks, since there are usually multiple open chromatin regions near one gene and now the  
596 prior knowledge about which particular region is more informative than others in terms of one  
597 marker is limited. Considering the cell type assignment outcomes are nearly uniform in Fig 2B-C,  
598 the cell types of snATAC-seq predicted using scRNA were grouped into the same cluster as  
599 matching sorted porcine PBMCs in bulk ATAC-seq of in Supplementary Fig 3B-3C and the  
600 predicted cell type by integrating with scRNA in Fig 2C is more definitive compared to that in  
601 Fig2B, we used the predicted cell types using scRNA-seq to conduct further analysis.  
602

603 After studying the characteristic of cell type DAP near a TSS of a gene, we found that our  
604 dataset predicted the prospective TSS specifically used in the matching porcine immune cell  
605 types. Among DAPs including TSS of characterized cell markers in Herrera-Uribe et al., 2020,  
606 we predicted that 2 DAPs overlay the cell type specific TSS candidates for *CSF1R* and *CD8A*  
607 (Figure 3C-D and Supplementary Fig15).  
608

### 609 **3.3 Porcine PBMC cell type regulatory elements were enriched for transcription factors** 610 **known to control immune cell differentiation and function.**

611  
612 A characteristic of cell type regulatory elements is that they can also be used to identify putative  
613 regulatory factors through TFBM enrichment analysis. This can be especially useful to  
614 complement regulatory network analysis using scRNAseq alone, since scRNA-seq is sparse and  
615 insensitive for detecting lowly expressed TFs. Thus, we defined the TFs that lead to the cell type  
616 specific biological functionality and that function ubiquitously across multiple pig immune cells  
617 by recognizing the TFs whose binding motif are enriched in cell type DAPs (Fig. 4). The binding  
618 motif of *PU.1* (*SPI1*), *ETS*, *ETS1*, *ETV2*, *Elk1*, *EWS*, *RUNX* and *Zfp281* were predicted to be

619 comprehensively enriched in diverse cell type DAPs. Besides, *PU.1* was predicted as regulators  
620 in myeloid cells (pDCs, cDCs and monocytes) via 3 schemes: *PU.1*, *PU.1:IRF8*, and *PU.1-IRF*.  
621 We observed several TFs (*POU5F1*, *POU2F3*, *POU2F2* and *POU3F3*) in the *POU* domain  
622 family whose binding motif are enriched in ASC and B cell DAPs. The observed specificity of  
623 *Oct2* (*POU2F2*) in B cells is consistent with what has been previously reported (Küppers, 2021).  
624 We also have identified several known cell-specific TF. *Nur77*, encoded by the *NR4A1* gene and  
625 whose binding motif was enriched in CD2posGD cell DAPs in F, was reported to be expressed  
626 in pig Treg cells and has been recently shown to mediate T cell differentiation even during  
627 immunosuppression by calcineurin inhibitors (Sekiya et al., 2022). Our finding that binding  
628 motif of a couple of *GATA* family TFs including *GATA3* are most enriched in CD2negGD cells  
629 agrees with the observation that *GATA3* is highly expressed in pig CD2negGD cells compared to  
630 other GD cells (Rodríguez-Gómez et al., 2019; Gu et al., 2022), as well as the *GATA3* gene  
631 expression pattern reported in Herrera-Uribe et al., 2021 (Supplementary Fig 13B). At the same  
632 time, some novel regulators were predicted in this TFBM analysis. The predicted regulative  
633 function of *Spi-B* and *TCF12* in pDCs DAPs supported a sparsely studied interaction (Nagasawa  
634 et al., 2008).

635

### 636 **3.4 Cis-acting regulatory networks and transcription factor-target gene relationships** 637 **predicted from correlating chromatin accessibility of regulatory elements**

638

639 The prediction for the involvement of a TF in regulating genes through DAP for each cell type  
640 above did not attempt to connect a specific TF and its target gene(s). To define the regulatory  
641 networks with a higher resolution, the TFs were linked to DE target genes in each cell type via  
642 CCAN generation and identifying the regulatory network for such genes. The summary of  
643 number of CCAN associated with a DEG in each cell type was provided in Table 1. The fact that  
644 no such CCAN in CD2negGD might be due to the fact that CD2negGD has the least number of  
645 DEG with a promoter DAP, making it less possible to construct enough peak connections to  
646 assemble a CCAN associated with these DEG. Since the peaks are co-accessible with the DAP  
647 overlapping with a TSS of a DEG and are mostly within a window of size of 500,000 bp,  
648 motivated by the fact that scientist found the peaks near a gene are highly consistent with the  
649 regulatory enhancer region of identified using Chip-seq (Muto et al., 2021), we assumed that the  
650 promoter or enhancer region of that DEG can be covered in the genomic regions in the CCAN.  
651 Driven by the aim of exploring the prospective regulator for DEG, we performed TFBM analysis  
652 for each CCAN having a hub peak overlapping with a TSS of DEG. As a consequence, our  
653 outcomes summarized in Fig 6 indicate that CCANs are a powerful means to recognize regulator  
654 candidates of DEG and potentially refine the TF-target genes described in Fig 4. Additionally,  
655 our predicted TFs and their related DEG were highly consistent with or similar to regulatory  
656 relationships predicted in the ENCODE TFTD. This cross-species verification provided evidence  
657 that our predicted relationship between a regulator and its target gene may often be correct.  
658 Nevertheless, we also pinpoint some either new or porcine-specific TF-target gene pairs. Our  
659 results demonstrate the great power and sensitivity of snATAC-seq to elucidate the chromatin  
660 accessibility landscape of pig immune cells, determine the known cell types based on the DNA  
661 open element pattern, predict the regulators for each cell type, and create the first resource of TF  
662 and possible target genes, including the matching possible binding sites, in different unstimulated  
663 porcine immune cell types.

664

#### 665 **4. Limitations**

666

667 We recognize several limitations that constrained our power and likely accuracy. Firstly, we  
668 have only two biological replicates of PBMC from a single timepoint and pig breed. However,  
669 open chromatin regions in our replicates were very consistent, and by using un-manipulated  
670 PBMC we avoided potential changes to cell transcriptomes that can occur with the extensive  
671 sorting that would be required to collect large numbers of rare cells, such as ASC or DC. Our  
672 ability to exclude potential breed biases reflected in the results from adult Yorkshire pigs is  
673 limited, but this first dataset provides a foundation that can be expanded. In addition, our  
674 published scRNA and snATAC were profiled from different samples. Profiling gene expression  
675 and chromatin accessibility from the same cells could be helpful to avoid the integration of these  
676 two ‘omic’ datasets. However, the integration produced a combined cell type annotation was  
677 highly consistent between omics methods.

678

#### 679 **5. Conclusions**

680

681 The genome-wide catalog of regulatory elements in this snATAC-seq dataset, including the cell  
682 type DAPs and the regulatory elements in the CCAN at a DEG are important resources to  
683 improve genome-wide genetic variation analyses. One example use of these data is filtering of  
684 variants associated with important phenotypes such as disease resilience and resistance in pig  
685 populations, as a majority of disease- and trait-associated noncoding Genome-wide association  
686 study (GWAS) variants are localized in this type of genomic regions (Maurano et al., 2012). The  
687 predicted TF-target gene network is also a highly useful resource for future characterization of  
688 the regulatory elements controlling porcine immune cell identity for immunology and biomedical  
689 modeling.

690

#### 691 **6. MATERIALS AND METHODS**

692

##### 693 ***6.1 PBMC sample collection, nuclei isolation and snATAC-seq using 10x Chromium***

694 Four PBMC samples were isolated from 2 healthy 6-month-old FAANG founder male Yorkshire  
695 pigs using standard techniques(Herrera-Uribe et al., 2021). PBMC nuclei were isolated by  
696 following DEMONSTRATED PROTOCOL: Nuclei Isolation for Single Cell ATAC Sequencing  
697 (10x Genomics) with an adjustment: The concentration of nuclei suspension, which were stained  
698 by Ethidium homodimer-1, was measured and determined using Countess II FL Automated Cell  
699 Counter. Then 4 libraries from two batches were constructed as described in Chromium Next  
700 GEM Single Cell ATAC Reagent Kits v1.1 (10x Genomics) and sequenced via Illumina  
701 Novaseq 6000 sequencing runs at DNA facility at Iowa State University.

702

##### 703 ***6.2 Demultiplexing and generation of single-cell accessibility counts***

704 Porcine genome reference and gff3 file were downloaded from ensembl 102 and used to generate  
705 the config to create a reference package using cellranger-atac mkref function of Cell Ranger  
706 ATAC (V.1.2.0). Then the base call files (BCLs) were demultiplexed using cellranger-atac  
707 function to produce the FASTQ files. For each library, the single cell accessibility counts matrix  
708 was generated using the customized reference package by cellranger-atac count command.

709

##### 710 ***6.3 Nuclei doublet detection***



711 To remove the doublet resulting from droplet that contains two cells, nuclei doublet detection  
712 using ArchR (1.0.1) was performed on R 4.1.1. The geneAnnotation was created using  
713 createGeneAnnotation function of ArchR with customized org and TxDb packages for *Sus scrofa*  
714 as input. ArrowFile for each of the dataset was constructed by running ArchR function  
715 createArrowFiles with the fragment files generated by Cell Ranger ATAC, geneAnnotation and  
716 genomeAnnotation *scrofa* genome *Sscrofa* 11.1 as input with default parameter. Inferred doublet  
717 score for each cell was added to each of the Arrow file using addDoubletScores function with  
718 default parameter. An ArchRProject was created by running ArchRProject function with  
719 generated arrow files as input. Then, 1466 detected nuclei doublets were filtered out with  
720 filterDoublets function with default filterRatio. The cell barcodes of non-doublets were pulled  
721 out for downstream analysis.  
722

#### 723 **6.4 Quality control, snATAC-seq datasets integration, and clustering**

724 The detected peaks using cellranger-atac in two datasets from animal 6798 and 6800 were  
725 merged using reduce function of GenomicRanges (1.42.0), respectively (Lawrence et al., 2013).  
726 The merged 6798 peaks having overlaps with merged 6800 peaks were merged with merged  
727 6800 using subsetByOverlaps of GenomicRanges. The peaks with a width  $\geq 10000$  bp or  $\leq 20$   
728 bp were filtered out from the merged peaks of two animals to generate a set of high-quality  
729 unified peaks. The fragments detected was counted in this new set of peaks using FeatureMatrix  
730 command of Signac (1.4.0), a ChromatinAssay was created by CreateChromatinAssay of Signac  
731 with min.features = 1000 and a Seurat (4.0.5) object was created using CreateSeuratObject for  
732 each of the dataset. The cells predicted to be doublets by ArchR were removed every Seurat  
733 object. Low-quality cells were removed from 4 Seurat objects (nucleosome\_signal < 4,  
734 TSS.enrichment > 2, nCount\_peaks > 2000, nCount\_peaks < 30000) before term frequency  
735 inverse document frequency (RunTFIDF) normalization. 4 Seurat objects were merged and  
736 visualized by RunUMAP with dims = 2:30 as input. A set of integration anchors were defined by  
737 FindIntegrationAnchors and used as input to integrate 4 Seurat objects by running  
738 IntegrateEmbeddings using 1:30 dimensions of merged Seurat object. The integrated snATAC-  
739 seq Seurat object was normalized and its most variable features were identified by RunTFIDF  
740 and FindTopFeatures, respectively. The correlation between sequencing depth and every reduced  
741 dimension component was checked by DepthCor. 2:30 reduced dimensions of the integrated  
742 Seurat object were used to define 35 clusters by running “FindClusters” with a resolution = 2.4  
743 using shared nearest neighbor (SNN) clustering algorithm. A bar plot was created to visualize the  
744 percent of cells in each cluster from each dataset. The DAP and the number of DAP in all  
745 pairwise clusters were summarized in Supplementary Table 1-2.  
746

#### 747 **6.5 Cell type annotation for clusters using snATAC-seq**

748 Regulatory regions potentially controlling cluster-specific gene expression were identified by  
749 measuring DAP for each cluster using FindAllMarkers of Seurat with min.pct = 0.2,  
750 logfc.threshold = 0.25, only.pos = TRUE. The list of DAPs for each cluster was provided in  
751 Supplementary Table 3. Predicted gene activity profiles were created using two ways: 1) by  
752 counting the Tn5 transposase cutting sites in fragments of nearby genes (<2000 bp from TSS).  
753 Particularly, the overall estimated gene activity of the gene markers used in Herrera-Urbe et al.,  
754 2021 were used to decide the cell types for clusters. This was used to roughly narrow down the  
755 possible clusters for a cell type (Supplementary Fig 6-11). 2) by counting the Tn5 transposase  
756 cutting sites at a cluster DAP whose nearest gene is one of the gene markers used in Herrera-  
757 Uribe et al., 2021 (Supplementary Table 4)(Herrera-Urbe et al., 2021). This criterion was used

758 to determine the cell types more precisely in Fig 2A-B. The example comparison of the predicted  
759 gene activities using these two methods are provided in Supplementary Fig 12. The principles  
760 reflected in Fig 1C, Supplementary Fig 12 and Supplementary Table 4 to annotate the cell types  
761 are described as below.

762  
763 A. The first cell type determined was monocyte (cluster 5, 7, and 9) by checking the chromatin  
764 accessibility at 5 DAPs near *CSF1R*, *CD14* and *CD86* (first 5 columns in Fig 1C).

765 B. The next cell type decided was B cells (cluster 0,3, 4, 8, 11, 18, 20) based on the chromatin  
766 openness at 2 DAPs near *PAX5* and *CD19* (6<sup>th</sup>-7<sup>th</sup> column in Fig 1C, Supplementary Fig 12 A-B).  
767 Then cluster 27 was defined as ASC using 3 DAPs near *PRDM1* and *TCF4* (*TCF4* was highly  
768 expressed in ASC though it was not classified as an ASC marker in Herrera-Uribe et al.,  
769 2021)(8<sup>th</sup>-10<sup>th</sup> columns in Fig 1C).

770 C. DC clusters (26 and 29) were decided based on a DAP near *FLT3* and was further  
771 interpreted as cDCs (26) based on 3 DAPs near *SLA-DRB1* and pDCs (29), with an elevated  
772 Tn5 cutting sites in 4 DAPs at *XBPI*, *IRF8*, *IRF8* and *CD4*.

773 D. Chromatin accessibility at a DAP neighboring *CD3E*, identified T cell clusters (1, 2, 6, 12, 13,  
774 14, 16, 17, 19, 21, 22, 23, 24, 25, 28, 30, 32, 33, 34). Subsequently, clusters 2, 6 and 12 were  
775 characterized as CD4posab since the cells are largely accessible at *CD4* DAP. Detection of  
776 chromatin openness at 3 DAPs near *CD8B* and *CD8A* enabled the definition of CD8abPOSab (13,  
777 19, 23, 24, 30, 32). Afterwards, cluster 10 was characterized as NK due to the lack of chromatin  
778 accessibility at *CD3E* DAP and the openness at *PRF1* DAP and *KLRK1* DAP.  
779 CD8abPOSabT\_NK (25 and 33) was determined since the cells demonstrate the chromatin  
780 openness at *CD3E*, *CD8A*, *PRF1* and *KLRK1*. *TRDC* gene activity was investigated to define GD  
781 cells (1, 14, 16, 28 and 22). Furthermore, the presence/absence of DNA accessibility at *SLA-*  
782 *DRB1*, *CD8A*, *PRF1* and *KLRK1* DAPs were used to classify CD2posGD (22) and CD2negGD  
783 (1, 14, 16, 28) since these genes are highly expressed in CD2posGD Herrera-Uribe et al., 2021  
784 though they were not described as CD2posGD marker. Cluster 17, 21 and 34 were grouped into a  
785 particular subtype of T cells due to the co-accessibility of chromatin near markers of various cell  
786 types.

787 E. Cluster 15 and 31 was determined as unknown cell type since it has elevated estimated gene  
788 activity for *PAX5*, *XBPI*, *CD3E*, *PRF1* and *TRDC*.

789

## 790 **6.6 Cell type annotation for snATAC clusters by integration with scRNA dataset**

791 To further annotate the cell types, the cell types were predicted for each cell by integrating  
792 snATAC-seq with our published PBMC scRNA-seq data(Herrera-Uribe et al., 2021). A set of  
793 anchors were detected by running FindTransferAnchors having estimated gene activity of  
794 snATAC-seq as query and scRNA-seq data as reference with reduction = 'cca'. The most  
795 possible cell type labels predicted for each of the cell in snATAC-seq dataset were transferred to  
796 snATAC-seq by TransferData with the new reduction of integrated snATAC-seq as  
797 weight.reduction and dims = 2:30. The cells in snATAC-seq with a low prediction.score.max <=  
798 0.5 were excluded from our Seurat object.

799

## 800 **6.7 Cell type DAP identification**

801 Based on the predicted cell type labels by integrating with scRNA-seq, the genomic regions  
802 differentially accessible in one cell type compared to the average of all other cell types were

803 detected by running FindAllMarkers function of Seurat with min.pct = 0.1, only.pos = TRUE ,  
804 logfc.threshold = 0.25 and p\_val\_adj < 0.05. The list of such DAPs for each cell type was  
805 provided in Supplementary Table 7 celltype.DAP.summary.

## 806 **6.8 Comparison with bulk ATAC-seq**

807 We identified shared peaks between scATAC and ATAC-seq of bulk sorted porcine PBMC  
808 populations using bedtools intersect with reciprocal overlap > 25% between peaks(Quinlan and  
809 Hall, 2010). Read counts in common peaks were obtained using featureCounts(Liao et al., 2014),  
810 and principal component analysis was applied using base R software to visualize clustering of  
811 scATAC-derived and bulk sorted PBMC populations. Enrichment and corresponding significance  
812 of cell type DAPs within DAPs from bulk sorted porcine PBMC populations were calculated  
813 using hypergeometric tests in base R.

## 814 **6.9 GO analysis of the genes close by cell type specific DAPs**

815 The nearest gene of the cell type DAPs were found and then converted to matching human  
816 homologous via Ensembl 102. Further, GO analysis was performed for each cell type using  
817 Metascape with the corresponding human genes as input(Zhou et al., 2019). The ontology terms  
818 in which the input genes are enriched were detected using hypergeometric test and Benjamini-  
819 Hochberg p-value correction algorithm with all genes in the genome as background.  
820 Enriched terms were groups into clusters and Kappa-test score was used to capture the most  
821 representative term for each cluster. Further, the most significant terms with a Kappa score above  
822 0.3 in each cluster were kept. The networks are all visualized via Cytoscape(Shannon et al.,  
823 2003). The GO analysis result was summarized in Supplementary Figure 16-20.

## 824 **6.10 Transcription factor binding motif analysis of cell type DAPs**

825 TFs associated with each cell type and might act as important regulators in each cell type. TFBM  
826 analysis was performed using HOMER with this setting “-size given -mask -mset vertebrates” to  
827 discover the TFs whose binding motif are enriched in exact size of cell type DAPs compared to  
828 the GC-content matching background peaks generated from the Sscrofa11.1 genome. The q  
829 value of a TF binding motif was calculated by taking the average q values of this TF in the  
830 corresponding cell type DAP if its binding motif is enriched in one cell type DAPs via different  
831 co-factors. The threshold of q value of TF binding motifs was set as 0.05. The known motif  
832 enrichment results for each cell type were listed in Supplementary Table 8  
833 TFBM.celltype.known.result.summary.  
834

## 835 **6.11 Generation of cis-co-accessible networks using Cicero**

836 Chromatin cis-co-accessibility analysis was performed using R package Cicero (1.8.1). Seurat  
837 object of each cell type was converted to CellDataSet format via as.cell\_data\_set and then used  
838 to generate input for cicero by make\_cicero\_cds function. The co-accessibility score for all peak  
839 pairs on each chromosome of Sscrofa 11.1 was calculated using the generated CellDataSet object  
840 by running run\_cicero. All pairwise peaks are filtered following these criteria: 1) At least one of  
841 the pairwise peaks are a DAP in the matching cell type, 2) The co accessibility score of the  
842 pairwise peaks are greater than 0.05. The peaks meet the criteria above were grouped into co-  
843 accessible networks using generate\_ccans with default setting. The constructed CCANs were  
844 further refined as below: 1) The center peak of the CCAN overlaps with a TSS of a DEG in the  
845 matching cell type. 2) All peaks in the CCAN were assigned with the same CCAN number.  
846

847

## 848 **6.12 Prediction of the regulator for DEG in each cell type**

849 TFBM was conducted using HOMER with following setting “-size given -mask -mset  
850 vertebrates -N 300” to predict the TFs whose binding motif are enriched in peaks of each CCAN  
851 described above compared to the GC-content matching background peaks generated from  
852 Sscrofa11.1 genome. The threshold of q value of TF was set as 0.1.

853

### 854 **Data availability Statement**

855 Raw sequencing data from snATAC-seq are available through the European Nucleotide Archive  
856 (project: PRJEB68307 (SAMEA8050928) at  
857 <https://www.ebi.ac.uk/ena/browser/view/PRJEB68307> and PRJEB68308 (SAMEA8050929) at  
858 <https://www.ebi.ac.uk/ena/browser/view/PRJEB68308>). The scripts used for this study can be  
859 found at [https://github.com/pengxin2019/snATAC\\_PBMC\\_2023\\_Tuggle](https://github.com/pengxin2019/snATAC_PBMC_2023_Tuggle).

860

### 861 **Ethics Statement**

862 The animal study was reviewed and approved by USDA-ARS-NADC Animal Care and Use  
863 Committee.

864

### 865 **Author Contributions**

866 CT and CL conceptualized and supervised research. JH-U, KB, and CL collected and  
867 cryopreserved PBMC samples. PX-Y performed nuclei isolations, supervised the sequencing and  
868 analyzed the snATAC-seq dataset. PX-Y, RC, CL, and CT interpreted the data and drafted the  
869 manuscript. RC provided the bulk ATAC-seq data from flow-sorted cell populations. LD assisted  
870 PX-Y with early bioinformatics analyses. All authors contributed to the writing of the materials  
871 and methods, edited the manuscript, and approved the final version.

872

### 873 **Conflict of Interest**

874 The authors declare that the research was conducted in the absence of any commercial or  
875 financial relationships that could be construed as a potential conflict of interest.

876

### 877 **Acknowledgements**

878 This work is supported by National Institute of Food and Agriculture (NIFA) Project 2018-  
879 67015-2701 and USDA-ARS CRIS 5030-31320-004-00D. We thank the DNA facility at the  
880 Iowa State University for technical support and sequencing platforms used in this study. In  
881 addition, we thank the NADC animal care staff for their efforts. We also thank Dr. Jayne Wiarda  
882 for explaining the scRNA-seq dataset and giving suggestions on data analysis. The data analysis  
883 of this work was performed on high performance computing Nova cluster of Iowa State  
884 University.

885

### 886 **References**

887

888 Barut, G. T., Kreuzer, M., Bruggmann, R., Summerfield, A., and Talker, S. C. (2023). Single-  
889 cell transcriptomics reveals striking heterogeneity and functional organization of dendritic  
890 and monocytic cells in the bovine mesenteric lymph node. *Front Immunol* 13. doi:  
891 10.3389/fimmu.2022.1099357.



- 892 Buenrostro, J. D., Corces, M. R., Lareau, C. A., Wu, B., Schep, A. N., Aryee, M. J., et al. (2018).  
893 Integrated Single-Cell Analysis Maps the Continuous Regulatory Landscape of Human  
894 Hematopoietic Differentiation. *Cell* 173, 1535-1548.e16. doi: 10.1016/j.cell.2018.03.074.
- 895 Dawson, H. D., Loveland, J. E., Pascal, G., Gilbert, J. G. R., Uenishi, H., Mann, K. M., et al.  
896 (2013). Structural and functional annotation of the porcine immunome. *BMC Genomics* 14.  
897 doi: 10.1186/1471-2164-14-332.
- 898 Foissac, S., Djebali, S., Munyard, K., Vialaneix, N., Rau, A., Muret, K., et al. (2019). Multi-  
899 species annotation of transcriptome and chromatin structure in domesticated animals. *BMC*  
900 *Biol* 17. doi: 10.1186/s12915-019-0726-5.
- 901 Groenen, M. A. M., Archibald, A. L., Uenishi, H., Tuggle, C. K., Takeuchi, Y., Rothschild, M.  
902 F., et al. (2012). Analyses of pig genomes provide insight into porcine demography and  
903 evolution. *Nature* 491. doi: 10.1038/nature11622.
- 904 Gu, W., Madrid, D. M. C., Joyce, S., and Driver, J. P. (2022). A single-cell analysis of  
905 thymopoiesis and thymic iNKT cell development in pigs. *Cell Rep* 40. doi:  
906 10.1016/j.celrep.2022.111050.
- 907 Herrera-Uribe, J., Liu, H., Byrne, K. A., Bond, Z. F., Loving, C. L., and Tuggle, C. K. (2020).  
908 Changes in H3K27ac at Gene Regulatory Regions in Porcine Alveolar Macrophages  
909 Following LPS or PolyIC Exposure. *Front Genet* 11. doi: 10.3389/fgene.2020.00817.
- 910 Herrera-Uribe, J., Wiarda, J. E., Sivasankaran, S. K., Daharsh, L., Liu, H., Byrne, K. A., et al.  
911 (2021). Reference Transcriptomes of Porcine Peripheral Immune Cells Created Through  
912 Bulk and Single-Cell RNA Sequencing. *Front Genet* 12. doi: 10.3389/fgene.2021.689406.
- 913 Jessen, C., Kreß, J. K. C., Baluapuri, A., Hufnagel, A., Schmitz, W., Kneitz, S., et al. (2020). The  
914 transcription factor NRF2 enhances melanoma malignancy by blocking differentiation and  
915 inducing COX2 expression. *Oncogene* 39, 6841–6855. doi: 10.1038/s41388-020-01477-8.
- 916 Kern, C., Wang, Y., Xu, X., Pan, Z., Halstead, M., Chanthavixay, G., et al. (2021). Functional  
917 annotations of three domestic animal genomes provide vital resources for comparative and  
918 agricultural research. *Nat Commun* 12. doi: 10.1038/s41467-021-22100-8.
- 919 Küppers, R. (2021). OBF1 and OCT1/2 regulate the germinal center B-cell program. *Blood* 137,  
920 2862–2863. doi: 10.1182/blood.2021010689.
- 921 Lawrence, M., Huber, W., Pagès, H., Aboyoun, P., Carlson, M., Gentleman, R., et al. (2013).  
922 Software for Computing and Annotating Genomic Ranges. *PLoS Comput Biol* 9. doi:  
923 10.1371/journal.pcbi.1003118.
- 924 Lesniewski, M. L., Fanning, L. R., Kozik, M., Weitzel, R. P., Hegerfeldt, Y., Sakthivel, R., et al.  
925 (2006). Transcription Factor BACH2 Inhibits AP1 Proteins JunB and FosL1 in Umbilical  
926 Cord Blood (UCB) CD4+ T-Cells. *Blood* 108, 1743–1743. doi:  
927 10.1182/blood.v108.11.1743.1743.
- 928 Liao, Y., Smyth, G. K., and Shi, W. (2014). FeatureCounts: An efficient general purpose  
929 program for assigning sequence reads to genomic features. *Bioinformatics* 30, 923–930. doi:  
930 10.1093/bioinformatics/btt656.
- 931 Lunney, J. K., van Goor, A., Walker, K. E., Hailstock, T., Franklin, J., and Dai, C. (2021). A N I  
932 M A L M O D E L S Importance of the pig as a human biomedical model. Available at:  
933 <https://www.science.org>.
- 934 Maurano, M. T., Humbert, R., Rynes, E., Thurman, R. E., Haugen, E., Wang, H., et al. (n.d.).  
935 Systematic Localization of Common Disease-Associated Variation in Regulatory DNA.  
936 Available at: <https://www.science.org>.

- 937 Michalska, A., Blaszczyk, K., Wesoly, J., and Bluysen, H. A. R. (2018). A positive feedback  
938 amplifier circuit that regulates interferon (IFN)-stimulated gene expression and controls  
939 type I and type II IFN responses. *Front Immunol* 9. doi: 10.3389/fimmu.2018.01135.
- 940 Muto, Y., Wilson, P. C., Ledru, N., Wu, H., Dimke, H., Waikar, S. S., et al. (2021). Single cell  
941 transcriptional and chromatin accessibility profiling redefine cellular heterogeneity in the  
942 adult human kidney. *Nat Commun* 12. doi: 10.1038/s41467-021-22368-w.
- 943 Myers, R. M., Stamatoyannopoulos, J., Snyder, M., Dunham, I., Hardison, R. C., Bernstein, B. E.,  
944 et al. (2011). A user's guide to the Encyclopedia of DNA elements (ENCODE). *PLoS Biol* 9.  
945 doi: 10.1371/journal.pbio.1001046.
- 946 Nagasawa, M., Schmidlin, H., Hazekamp, M. G., Schotte, R., and Blom, B. (2008).  
947 Development of human plasmacytoid dendritic cells depends on the combined action of the  
948 basic helix-loop-helix factor E2-2 and the Ets factor Spi-B. *Eur J Immunol* 38, 2389–2400.  
949 doi: 10.1002/eji.200838470.
- 950 Pliner, H. A., Packer, J. S., McFaline-Figueroa, J. L., Cusanovich, D. A., Daza, R. M.,  
951 Aghamirzaie, D., et al. (2018). Cicero Predicts cis-Regulatory DNA Interactions from  
952 Single-Cell Chromatin Accessibility Data. *Mol Cell* 71, 858-871.e8. doi:  
953 10.1016/j.molcel.2018.06.044.
- 954 Quinlan, A. R., and Hall, I. M. (2010). BEDTools: A flexible suite of utilities for comparing  
955 genomic features. *Bioinformatics* 26, 841–842. doi: 10.1093/bioinformatics/btq033.
- 956 Rodríguez-Gómez, I. M., Talker, S. C., Käser, T., Stadler, M., Reiter, L., Ladinig, A., et al.  
957 (2019). Expression of T-bet, eomesodermin, and GATA-3 correlates with distinct  
958 phenotypes and functional properties in porcine  $\gamma\delta$  T cells. *Front Immunol* 10. doi:  
959 10.3389/fimmu.2019.00396.
- 960 Rouillard, A. D., Gundersen, G. W., Fernandez, N. F., Wang, Z., Monteiro, C. D., McDermott,  
961 M. G., et al. (2016). The harmonizome: a collection of processed datasets gathered to serve  
962 and mine knowledge about genes and proteins. *Database (Oxford)* 2016. doi:  
963 10.1093/database/baw100.
- 964 Sekiya, T., Kasahara, H., Takemura, R., Fujita, S., Kato, J., Doki, N., et al. (2022). Essential  
965 Roles of the Transcription Factor NR4A1 in Regulatory T Cell Differentiation under the  
966 Influence of Immunosuppressants. *The Journal of Immunology* 208, 2122–2130. doi:  
967 10.4049/jimmunol.2100808.
- 968 Shannon, P., Markiel, A., Ozier, O., Baliga, N. S., Wang, J. T., Ramage, D., et al. (2003).  
969 Cytoscape: A software Environment for integrated models of biomolecular interaction  
970 networks. *Genome Res* 13, 2498–2504. doi: 10.1101/gr.1239303.
- 971 Stuart, T., Srivastava, A., Madad, S., Lareau, C. A., and Satija, R. (2021). Single-cell chromatin  
972 state analysis with Signac. *Nat Methods* 18, 1333–1341. doi: 10.1038/s41592-021-01282-5.
- 973 ENCODE Project Consortium (2004). The ENCODE (ENCyclopedia Of DNA Elements)  
974 Project. *Science (New York, N.Y.)*, 306(5696), 636–640.  
975 <https://doi.org/10.1126/science.1105136>
- 976 Vandiedonck, C. (2018). Genetic association of molecular traits: A help to identify causative  
977 variants in complex diseases. *Clin Genet* 93, 520–532. doi: 10.1111/cge.13187.
- 978 Wu, H., Dong, J., Yu, H., Wang, K., Dai, W., Zhang, X., et al. (2022). Single-Cell RNA and  
979 ATAC Sequencing Reveal Hemodialysis-Related Immune Dysregulation of Circulating  
980 Immune Cell Subpopulations. *Front Immunol* 13. doi: 10.3389/fimmu.2022.878226.

- 981 Zhao, Y., Hou, Y., Xu, Y., Luan, Y., Zhou, H., Qi, X., et al. (2021). A compendium and  
982 comparative epigenomics analysis of cis-regulatory elements in the pig genome. *Nat*  
983 *Commun* 12. doi: 10.1038/s41467-021-22448-x.
- 984 Zhou, Y., Zhou, B., Pache, L., Chang, M., Khodabakhshi, A. H., Tanaseichuk, O., et al. (2019).  
985 Metascape provides a biologist-oriented resource for the analysis of systems-level datasets.  
986 *Nat Commun* 10. doi: 10.1038/s41467-019-09234-6.
- 987
- 988

A

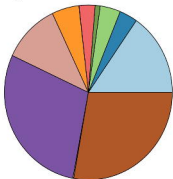

- Promoter (<=1kb) (15.34%)
- Promoter (1~2kb) (3.48%)
- Promoter (2~3kb) (3.93%)
- 5' UTR (0.96%)
- 3' UTR (3.08%)
- 1st Exon (0.03%)
- Other Exon (5.24%)
- 1st Intron (11.02%)
- Other Intron (28.96%)
- Downstream (<=300) (0.16%)
- Distal Intergenic (27.8%)

B

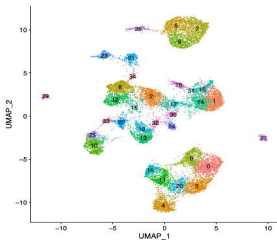

C

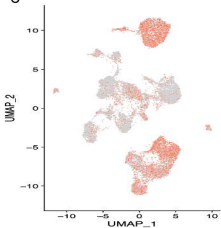

D

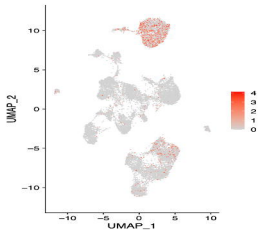



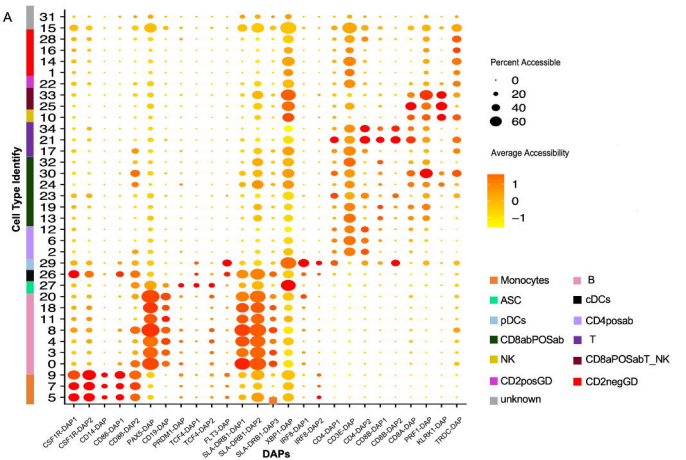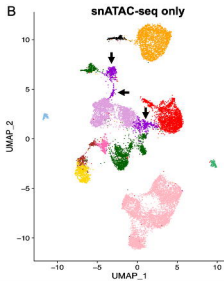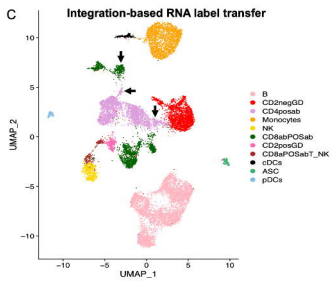

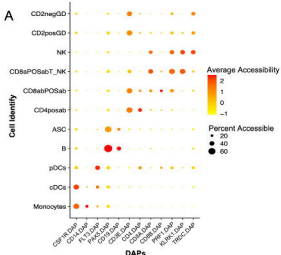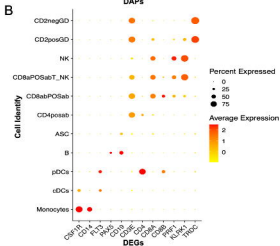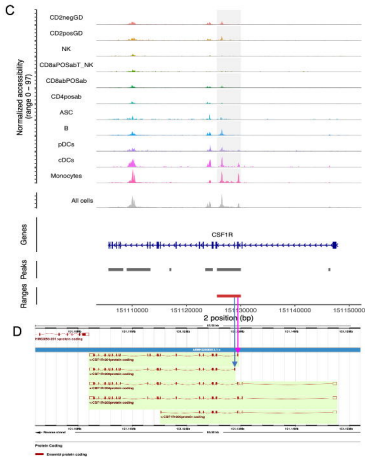

-log<sub>10</sub> FDR of enrichment score

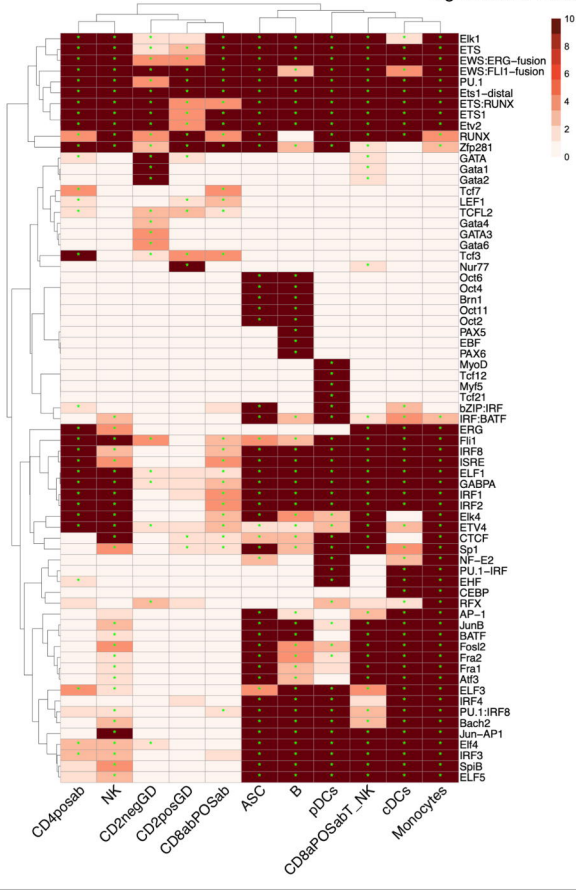

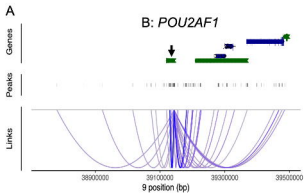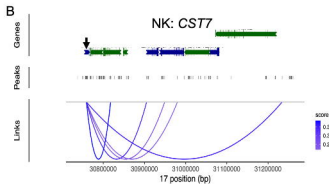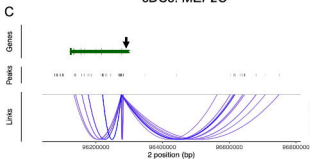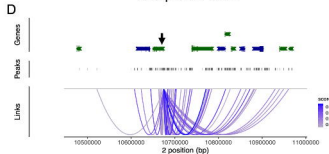



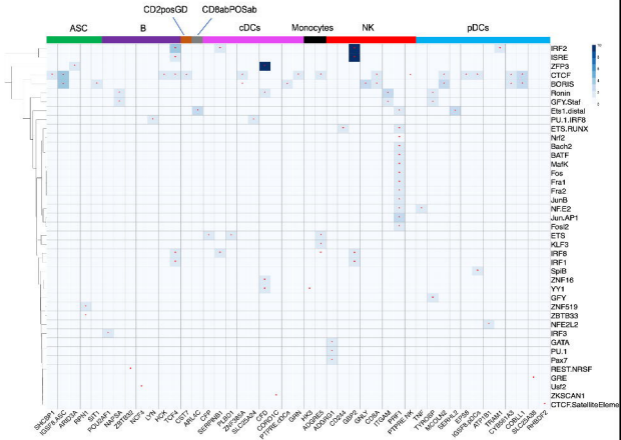

Source: https://www.biorxiv.org/content/biorxiv/early/2024/01/09/2024.01.09.574769.full.pdf
